# Supplementary material for: Gene Expression Analysis Reveals the Regulatory Effect of <em>Ficus carica</em> Latex on Cell Cycle Progression in Human Papillomavirus Positive Cervical Cancer Cell Lines
Source: Preprints.org preprint supplement (doi:10.20944/preprints202309.1172.v1), 2023-09-18
Supplement: Supplementary file 3 [file supplementary]

| ENSEMBL ID | Gene Name | Expression Status | Fold change (log2 ratio) |
| --- | --- | --- | --- |
| ENSG00000006576 | TSHZ2 | Upregulated | 4.605 |
| ENSG00000010270 | GLT8D2 | Upregulated | 5.841 |
| ENSG00000020129 | RASIP1 | Upregulated | 2.618 |
| ENSG00000034510 | NDRG1 | Upregulated | 4.255 |
| ENSG00000040199 | STOM | Upregulated | 6.212 |
| ENSG00000047634 | PLEKHG4 | Upregulated | 5.362 |
| ENSG00000048544 | KLF4 | Upregulated | 5.33 |
| ENSG00000053770 | RMRP | Upregulated | 6.467 |
| ENSG00000056586 | FBXO4 | Upregulated | 5.549 |
| ENSG00000060642 | GPCPD1 | Upregulated | 7.987 |
| ENSG00000066933 | HIST1H1E | Upregulated | 5.732 |
| ENSG00000070366 | CTSF | Upregulated | 3.788 |
| ENSG00000076685 | BET1 | Upregulated | 7.918 |
| ENSG00000077514 | TMEM14C | Upregulated | 4.12 |
| ENSG00000079335 | BRIX1 | Upregulated | 7.706 |
| ENSG00000081913 | HIF1A | Upregulated | 6.226 |
| ENSG00000083457 | TMEM126A | Upregulated | 5.406 |
| ENSG00000085491 | CEP72 | Upregulated | 6.997 |
| ENSG00000091157 | CALR | Upregulated | 7.985 |
| ENSG00000099910 | MZT1 | Upregulated | 5.134 |
| ENSG00000100243 | RAD1 | Upregulated | 3.068 |
| ENSG00000100304 | RPL27 | Upregulated | 7.426 |
| ENSG00000100410 | SUB1 | Upregulated | 7.192 |
| ENSG00000100644 | PRRT3.AS1 | Upregulated | 3.534 |
| ENSG00000100888 | PDCD6 | Upregulated | 7.213 |
| ENSG00000101191 | TMEM126B | Upregulated | 4.164 |
| ENSG00000104419 | NELFE | Upregulated | 4.619 |
| ENSG00000105223 | RHEBL1 | Upregulated | 7.161 |
| ENSG00000105323 | PLD3 | Upregulated | 6.522 |
| ENSG00000105518 | MRPS30 | Upregulated | 4.743 |
| ENSG00000105538 | MRPS10 | Upregulated | 4.161 |
| ENSG00000105829 | NFIL3 | Upregulated | 4.839 |
| ENSG00000108100 | CENPK | Upregulated | 4.628 |
| ENSG00000111696 | DDX59 | Upregulated | 6.883 |
| ENSG00000111843 | C6orf136 | Upregulated | 5.69 |
| ENSG00000112234 | KLF13 | Upregulated | 5.772 |
| ENSG00000112877 | TMEM256 | Upregulated | 2.66 |
| ENSG00000112996 | CUL5 | Upregulated | 4.449 |
| ENSG00000113387 | SNRPD2 | Upregulated | 5.395 |
| ENSG00000113456 | RPS27A | Upregulated | 4.309 |
| ENSG00000113460 | TMSB10 | Upregulated | 5.669 |
| ENSG00000113761 | DNAJC21 | Upregulated | 7.386 |
| ENSG00000115942 | GAS5 | Upregulated | 5.269 |
| ENSG00000115944 | PAIP1 | Upregulated | 5.528 |
| ENSG00000118058 | RPL37 | Upregulated | 5.679 |
| ENSG00000118197 | CHMP1B | Upregulated | 5.898 |
| ENSG00000119004 | MRPS23 | Upregulated | 4.903 |
| ENSG00000120820 | RNF111 | Upregulated | 4.983 |
| ENSG00000122786 | GPR108 | Upregulated | 5.103 |
| ENSG00000123219 | COA4 | Upregulated | 4.777 |
| ENSG00000123562 | CYB5R3 | Upregulated | 4.75 |
| ENSG00000123636 | MRPL14 | Upregulated | 3.646 |
| ENSG00000125734 | SLC6A9 | Upregulated | 6.396 |
| ENSG00000125743 | MORF4L2 | Upregulated | 4.573 |
| ENSG00000125772 | TBC1D7 | Upregulated | 4.731 |
| ENSG00000127337 | ATP6AP2 | Upregulated | 6.933 |
| ENSG00000127870 | TTLL12 | Upregulated | 3.29 |
| ENSG00000130511 | POC1B | Upregulated | 2.609 |
| ENSG00000131469 | RPL39 | Upregulated | 4.097 |
| ENSG00000131725 | GPR180 | Upregulated | 7.868 |
| ENSG00000132646 | SCML1 | Upregulated | 6.991 |
| ENSG00000133789 | HNRNPUL1 | Upregulated | 2.927 |
| ENSG00000134308 | MANEAL | Upregulated | 7.291 |
| ENSG00000135870 | TMEM205 | Upregulated | 6.691 |
| ENSG00000136098 | ITGAE | Upregulated | 5.203 |
| ENSG00000136826 | FAM105B | Upregulated | 5.336 |
| ENSG00000136943 | WDR44 | Upregulated | 4.242 |
| ENSG00000137154 | PTMA | Upregulated | 6.087 |
| ENSG00000139323 | SSBP4 | Upregulated | 4.969 |
| ENSG00000139436 | PRIM1 | Upregulated | 7.513 |
| ENSG00000140199 | POLD3 | Upregulated | 4.764 |
| ENSG00000143947 | PCNA | Upregulated | 3.238 |
| ENSG00000144426 | FBXL4 | Upregulated | 5.398 |
| ENSG00000145592 | YEATS4 | Upregulated | 4.693 |
| ENSG00000145979 | WBSCR22 | Upregulated | 5.846 |
| ENSG00000147654 | C19orf66 | Upregulated | 5.101 |
| ENSG00000148175 | NEK3 | Upregulated | 4.88 |
| ENSG00000148296 | ORC2 | Upregulated | 3.568 |
| ENSG00000151461 | RPS6 | Upregulated | 3.233 |
| ENSG00000151876 | YIPF6 | Upregulated | 4.775 |
| ENSG00000152102 | LINC00910 | Upregulated | 5.103 |
| ENSG00000152520 | COX7A2L | Upregulated | 5.97 |
| ENSG00000152749 | C2orf47 | Upregulated | 5.75 |
| ENSG00000153827 | EBAG9 | Upregulated | 5.357 |
| ENSG00000157450 | YWHAQ | Upregulated | 4.579 |
| ENSG00000158321 | NBEAL1 | Downregulated | -4.419 |
| ENSG00000163249 | CCDC137 | Downregulated | -6.217 |
| ENSG00000165030 | NCDN | Downregulated | -5.203 |
| ENSG00000166233 | ZNF346 | Downregulated | -2.771 |
| ENSG00000166266 | RNF115 | Downregulated | -5.386 |
| ENSG00000166987 | ARIH1 | Downregulated | -4.746 |
| ENSG00000167550 | STARD3NL | Downregulated | -4.598 |
| ENSG00000168014 | DDRGK1 | Downregulated | -3.885 |
| ENSG00000168298 | SLC25A24 | Downregulated | -3.257 |
| ENSG00000168724 | PHF5A | Downregulated | -7.23 |
| ENSG00000169217 | UPF2 | Downregulated | -4.83 |
| ENSG00000169925 | CCNY | Downregulated | -2.36 |
| ENSG00000169926 | GIT2 | Downregulated | -3.702 |
| ENSG00000171202 | CALD1 | Downregulated | -6.634 |
| ENSG00000171204 | BRD3 | Downregulated | -2.495 |
| ENSG00000172239 | C2CD3 | Downregulated | -4.514 |
| ENSG00000173575 | PHTF2 | Downregulated | -2.961 |
| ENSG00000174080 | AP5M1 | Downregulated | -6.197 |
| ENSG00000176371 | SLC35E2 | Downregulated | -2.481 |
| ENSG00000176834 | PAN3 | Downregulated | -6.989 |
| ENSG00000177000 | ZNF652 | Downregulated | -3.871 |
| ENSG00000179218 | CHD8 | Downregulated | -5.72 |
| ENSG00000180992 | SURF6 | Downregulated | -2.464 |
| ENSG00000181610 | TRIP12 | Downregulated | -4.376 |
| ENSG00000181704 | CTSV | Downregulated | -2.713 |
| ENSG00000181924 | RC3H2 | Downregulated | -4.831 |
| ENSG00000182220 | MBD6 | Downregulated | -5.47 |
| ENSG00000182463 | PIP4K2B | Downregulated | -2.262 |
| ENSG00000183723 | DIDO1 | Downregulated | -6.276 |
| ENSG00000185090 | NT5C2 | Downregulated | -3.334 |
| ENSG00000185252 | RNF6 | Downregulated | -7.111 |
| ENSG00000185298 | PIGV | Downregulated | -3.012 |
| ENSG00000187514 | CD2BP2 | Downregulated | -6.644 |
| ENSG00000188825 | RP11.427H3.3 | Downregulated | -6.393 |
| ENSG00000196155 | RP11.697E2.7 | Downregulated | -4.879 |
| ENSG00000196517 | WDR7 | Downregulated | -5.236 |
| ENSG00000198056 | CCNYL1 | Downregulated | -3.639 |
| ENSG00000198171 | MYO9A | Downregulated | -2.981 |
| ENSG00000198538 | SLC12A6 | Downregulated | -6.905 |
| ENSG00000198740 | ZSCAN2 | Downregulated | -4.985 |
| ENSG00000198918 | RC3H1 | Downregulated | -5.259 |
| ENSG00000204356 | CMTM4 | Downregulated | -5.374 |
| ENSG00000204564 | SWAP70 | Downregulated | -7.211 |
| ENSG00000204899 | DNASE1 | Downregulated | -3.306 |
| ENSG00000205544 | CDC14A | Downregulated | -4.274 |
| ENSG00000213918 | ZNF74 | Downregulated | -5.024 |
| ENSG00000215421 | FAM168B | Downregulated | -5.109 |
| ENSG00000226266 | NT5DC3 | Downregulated | -4.581 |
| ENSG00000234741 | CYP20A1 | Downregulated | -3.658 |
| ENSG00000249915 | ZNF28 | Downregulated | -3.392 |
| ENSG00000255112 | CHD2 | Downregulated | -6.552 |
| ENSG00000265491 | ZNF407 | Downregulated | -5.567 |
| ENSG00000276293 | KMT2A | Downregulated | -5.327 |
| ENSG00000277027 | SMG6 | Downregulated | -5.69 |
| ENSG00000123636 | BAZ2B | Downregulated | -4.941 |
| ENSG00000081913 | PHLPP1 | Downregulated | -5.391 |
| ENSG00000235499 | AC073046.25 | Downregulated | -5.763 |
| ENSG00000263271 | RP11.1055B8.7 | Downregulated | -3.152 |
| ENSG00000176834 | VSIG10 | Downregulated | -6.344 |
| ENSG00000250899 | RP11.253E3.3 | Downregulated | -5.319 |
| ENSG00000176834 | MTHFR | Downregulated | -4.645 |
| ENSG00000099910 | KLHL22 | Downregulated | -4.285 |
| ENSG00000040199 | PHLPP2 | Downregulated | -4.35 |
| ENSG00000158321 | AUTS2 | Downregulated | -6.557 |
